# Supplementary material for: Elevated Platelet Count Appears to Be Causally Associated with Increased Risk of Lung Cancer: A Mendelian Randomization Analysis
Source: Oxford University Press journal article supplement (doi:10.1158/1055-9965.epi-18-0356), 2019-01-31
Supplement: 10559965epi180356-sup-199509_2_supp_4820672_pb7qy0.docx [file 10559965epi180356-sup-199509_2_supp_4820672_pb7qy0.docx]

**Additional Funding**

Transdisciplinary Research for Cancer in Lung (TRICL) of the International Lung Cancer Consortium (ILCCO) was supported by grants U19-CA148127 and CA148127S1. ILCCO data harmonization was supported by the Cancer Care Ontario Research Chair of Population Studies (to R.J.H.) and the Lunenfeld-Tanenbaum Research Institute, Sinai Health System.

The CAPUA study was supported by FIS-FEDER/Spain grants FIS-01/310, FIS-PI03-0365, and FIS-07-BI060604; FICYT/Asturias grants FICYT PB02-67 and FICYT IB09-133; and the University Institute of Oncology (IUOPA) of the University of Oviedo and the Ciber de Epidemiologia y Salud Pública (CIBERESP), Spain.

Work performed in the CARET study was supported by the National Institute of Health (NIH)/National Cancer Institute (NCI) UM1 CA167462 (PI: Goodman), NIH UO1-CA6367307 (PIs: Omen, Goodman), NIH R01 CA111703 (PI: Chen), and NIH 5R01 CA151989-01A1 (PI: Doherty).

The Liverpool Lung project was supported by the Roy Castle Lung Cancer Foundation.

The Harvard Lung Cancer Study was supported by the NIH/NCI grants CA092824, CA090578, and CA074386.

The Multiethnic Cohort Study was partially supported by NIH grants CA164973, CA033619, CA63464, and CA148127.

Work performed in the MSH–PMH study was supported by the Canadian Cancer Society Research Institute (020214), Ontario Institute of Cancer and Cancer Care Ontario Chair Award (to R.J.H. and G.L.), and Alan Brown Chair and Lusi Wong Programs at Princess Margaret Hospital Foundation.

NJLCS was funded by the State Key Program of National Natural Science of China (81230067), National Key Basic Research Program (2011CB503805), and Major Program of the National Natural Science Foundation of China (81390543).

The Norway study was supported by the Norwegian Cancer Society, Norwegian Research Council.

The Shanghai Cohort Study (SCS) was supported by NIH R01 CA144034 (PI: Yuan) and UM1 CA182876 (PI: Yuan).

The Singapore Chinese Health Study (SCHS) was supported by NIH R01 CA144034 (PI: Yuan) and UM1 CA182876 (PI: Yuan).

Work in the TLC study has been supported in part the James & Esther King Biomedical Research Program (09KN-15), NIH Specialized Programs of Research Excellence (SPORE) (P50 CA119997), and a Cancer Center Support Grant (CCSG) at the H. Lee Moffitt Cancer Center and Research Institute, an NCI designated Comprehensive Cancer Center (P30-CA76292).

The Vanderbilt Lung Cancer Study – BioVU dataset used for the described analyses was obtained from Vanderbilt University Medical Center’s BioVU, which is supported by institutional funding, the 1S10RR025141-01 instrumentation award, and by the Vanderbilt Nature Genetics: doi:10.1038/ng.3892.

The Clinical and Translational Science Awards (CTSA) grant UL1TR000445 was from the National Center for Advancing Translational Sciences (NCATS)/NIH. Dr. Aldrich was supported by NIH/NCI K07CA172294 (PI: Aldrich), and Dr. Bush was supported by National Human Genome Research Institute (NHGRI)/NIH U01HG004798 (PI: Crawford).

The Copenhagen General Population Study (CGPS) was supported by the Chief Physician Johan Boserup and Lise Boserup Fund, the Danish Medical Research Council, and Herlev Hospital.

The NELCS study was supported by grant P20RR018787 from the National Center for Research Resources (NCRR), a component of the NIH.

The Kentucky Lung Cancer Research Initiative was supported by the Department of Defense [Congressionally Directed Medical Research Program, US Army Medical Research and Materiel Command Program] under award 10153006 (W81XWH-11-1-0781). Views and opinions of and endorsements by the author(s) do not reflect those of the US Army or Department of Defense. This research was also supported by unrestricted infrastructure funds from the UK Center for Clinical and Translational Science, NIH grant UL1TR000117, and Markey Cancer Center NCI Cancer Center Support Grant (P30 CA177558) Shared Resource Facilities: Cancer Research Informatics, Biospecimen and Tissue Procurement, and Biostatistics and Bioinformatics.

The M.D. Anderson Cancer Center study was supported in part NIH grants P50 CA070907 and R01 CA176568 (to X. Wu), Cancer Prevention & Research Institute of Texas RP130502 (to X. Wu), and University of Texas MD Anderson Cancer Center institutional support for the Center for Translational and Public Health Genomics.

The deCODE study of smoking and nicotine dependence was funded in part by grant R01- DA017932 from the National Institutes on Drug Abuse (NIDA).

The Lodz center study was partially funded by Nofer Institute of Occupational Medicine under task NIOM 10.13: Predictors of mortality from non-small cell lung cancer - field study. Genetic sharing analysis was funded by NIH grant CA194393.

The ResoLuCENT study (Resource for the Study of Lung Cancer Epidemiology in North Trent) is funded by the Sheffield Hospitals Charity, Sheffield Experimental Cancer Medicine Centre and Weston Park Hospital Cancer Charity. Fiona Taylor was supported by a Cancer Research UK/Yorkshire Cancer Research Clinical Fellowship.
